# Supplementary material for: Venetoclax acts as an immunometabolic modulator to potentiate adoptive NK cell immunotherapy against leukemia
Source: PubMed Central journal article supplement — Cell Rep Med. 2024 May 21;5(6):101580. doi: 10.1016/j.xcrm.2024.101580 (PMC11228450; doi:10.1016/j.xcrm.2024.101580), 2024-05-21
Supplement: mmc1.pdf [file mmc1.pdf]

**Cell Reports Medicine, Volume 5**

**Supplemental information**

**Venetoclax acts as an immunometabolic  
modulator to potentiate adoptive NK cell  
immunotherapy against leukemia**

**Yan Wang, Beibei Huang, Tingting Liang, Lai Jiang, Mingming Wu, Xinru Liu, Mingming  
Zhu, Xian Song, Na Zhao, Haiming Wei, Changcheng Zheng, and Fang Ni**

1

## Supplemental Figures and Figure Legends

2

Figure S1

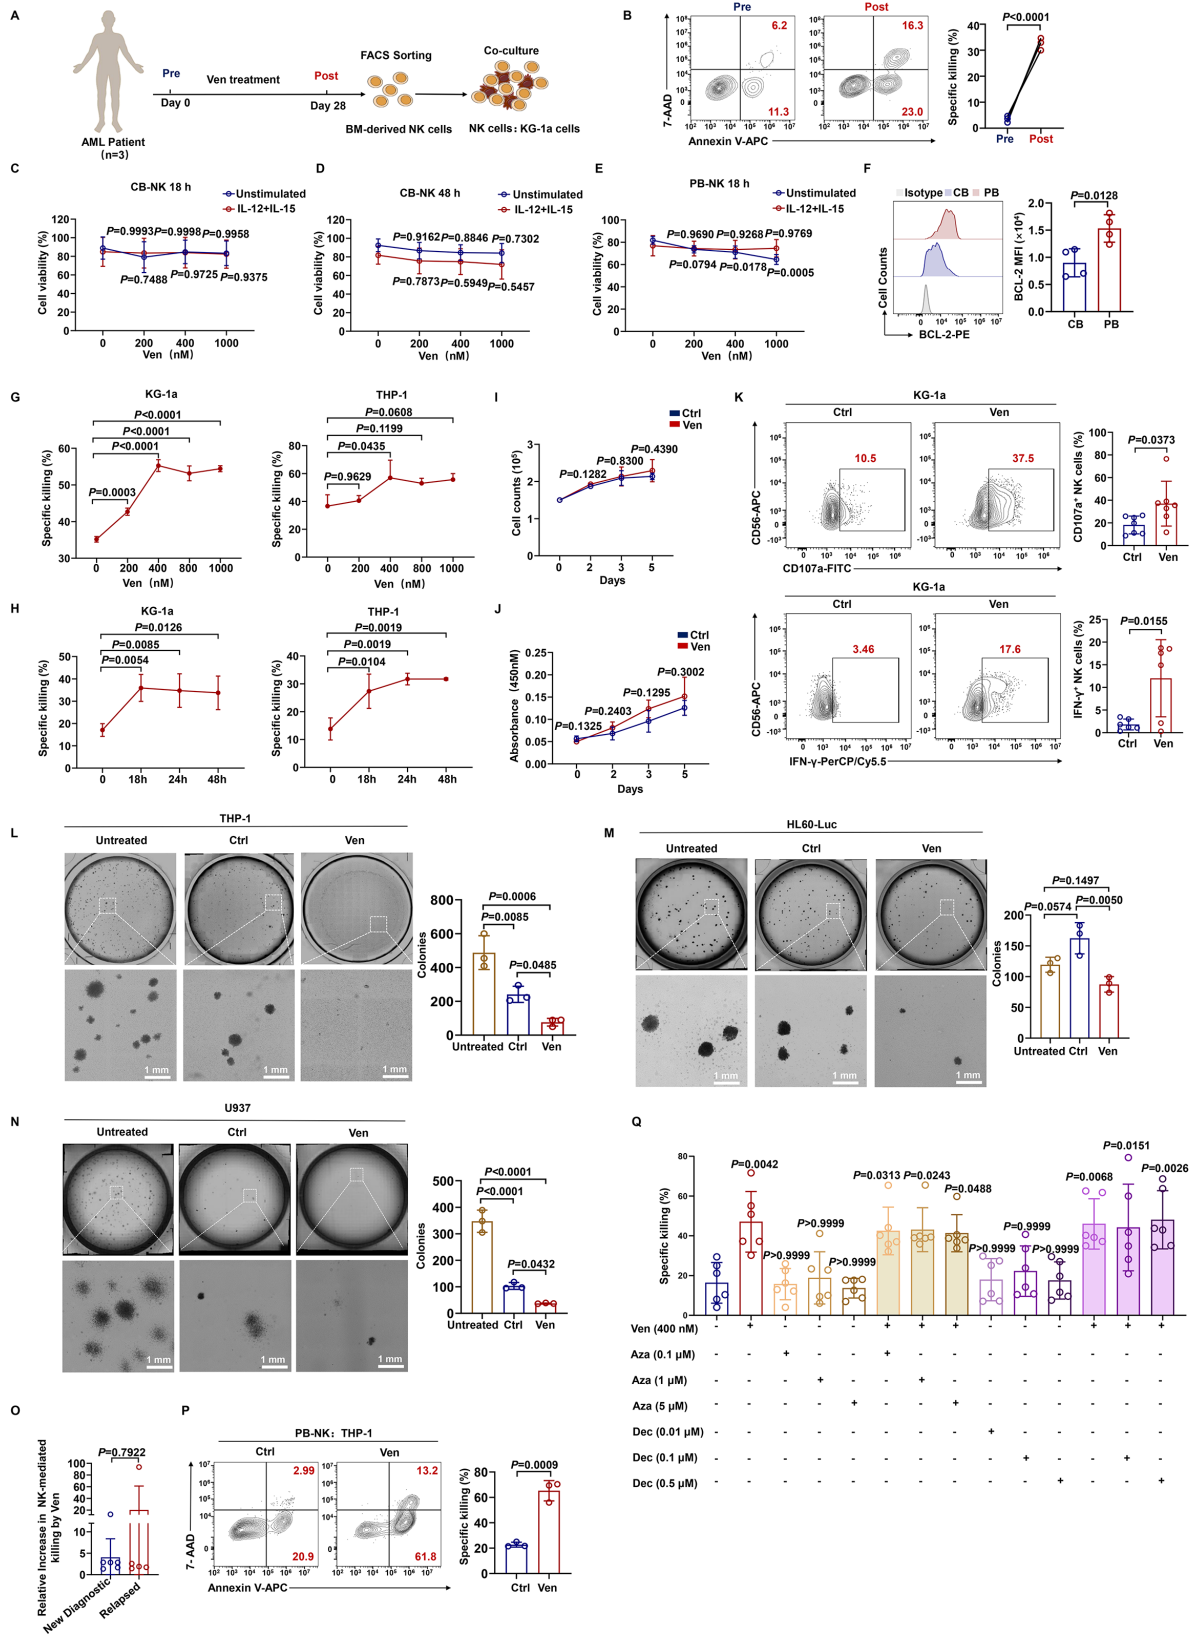

3 **Figure S1. Venetoclax enhances NK-mediated killing of AML cells without compromising NK cell viability,**  
4 **related to Figure 1.**

5 (A) Schematic strategy for isolating NK cells from the bone marrow of AML patients pre- and post-venetoclax  
6 treatment for cytotoxicity assays.

7 (B) Representative flow cytometry plots and quantification of the specific killing ability of NK cells ( $5 \times 10^4$  cells per  
8 well) derived from frozen bone marrow samples of AML patients pre- and post-venetoclax treatment against KG-1a  
9 cells at a 2.5:1 ratio for 4 h (n=3, biological replicates). The results represent three independent experiments.

10 (C) Sensitivity of resting or IL-12 (10 ng/mL) + IL-15 (50 ng/mL)-activated cord blood NK cells (CB-NK cells) to  
11 venetoclax for 18 h (n=4, biological replicates). NK cell viability was assessed by Annexin V/7-AAD co-staining.  
12 The results represent two independent experiments.

13 (D) Sensitivity of resting or IL-12 (10 ng/mL) + IL-15 (50 ng/mL)-activated CB-NK cells to venetoclax for 48 h  
14 (n=4, biological replicates), and the viability of NK cells were determined as in (C). The results represent two  
15 independent experiments.

16 (E) Sensitivity of resting or IL-12 (10 ng/mL) + IL-15 (50 ng/mL)-activated peripheral blood NK cells (PB-NK cells)  
17 to venetoclax for 18 h (n=4, biological replicates), and the viability of NK cells was determined as in (C). The results  
18 represent two independent experiments.

19 (F) Flow cytometric detection of BCL-2 expression in resting PB-NK or CB-NK cells (n=4, biological replicates).

20 (G) CB-NK cells ( $5 \times 10^4$  cells per well) treated with venetoclax (18 h), co-cultured with KG-1a or THP-1 cells (2.5:1  
21 ratio, 4 h, n=3, biological replicates). AML cell viability assessed by flow cytometry. The results represent two  
22 independent experiments using NK cells from different donors.

23 (H) CB-NK cells ( $5 \times 10^4$  cells per well) treated with 400 nM venetoclax (18 h, 24 h, 48 h) or untreated. Cytotoxicity  
24 against KG-1a (left, n=4, biological replicates) and THP-1 (right, n=3, biological replicates) cells were determined at  
25 a 2.5:1 ratio. The results represent two independent experiments using NK cells from different donors.

26 (I-J) Proliferation of CB-NK cells treated with or without venetoclax for the indicated time, as measured by cell  
27 counting (I, n=3, biological replicates) and CCK-8 assay (J, n=4, biological replicates).

28 (K) Representative flow cytometry plots (left) and quantification (right) of CD107a (n=7, biological replicates) and  
29 IFN- $\gamma$  (n=6, biological replicates) production in CB-NK cells pretreated with 400 nM venetoclax or untreated, upon  
30 stimulation with KG-1a cells in vitro. The results represent three independent experiments.

31 (L-N) Colony formation assay using THP-1, HL60-Luc, and U937 cells co-cultured with venetoclax-treated or  
32 untreated CB-NK cells (2.5:1 ratio, 4 h, n=3, biological replicates). Equal cell numbers ( $2 \times 10^3$  cells per dish) were

33 used. Colonies counted after 14 days.

34 (O) Impact of venetoclax on NK cell cytotoxicity against AML cells in newly diagnosed or relapsed AML patients  
35 (newly diagnosed n=6, biological replicates, relapsed n=5, biological replicates).

36 (P) Representative flow cytometry plots and quantification of venetoclax-pretreated (400 nM, 18 h) PB-NK cell  
37 ( $5 \times 10^4$  cells per well) killing of THP-1 cells (2.5:1 ratio, 4 h, n=3, biological replicates).

38 (Q) NK cells ( $5 \times 10^4$  cells per well) from different donors were treated with 400 nM venetoclax, azacitidine (Aza, 0.1-  
39 5  $\mu$ M), decitabine (Dec, 0.01-0.5  $\mu$ M) alone, or their combination for 18 h, and then co-cultured with KG-1a cells for  
40 4 h at a 2.5:1 ratio (n=6, biological replicates). The viability of KG-1a cells was assessed by flow cytometry using an  
41 Annexin V/7-AAD co-staining assay. The results represent three independent experiments.

42 Statistical significance was calculated by the unpaired Student's *t*-test (F, I, J, K, and P), paired Student's *t*-test (B),  
43 Mann-Whitney test (O), or one-way ANOVA with Tukey's multiple comparisons test (C, D, E, G, H, L, M, N, and  
44 Q). The data are represented as mean  $\pm$  SD.

45 **Figure S2**

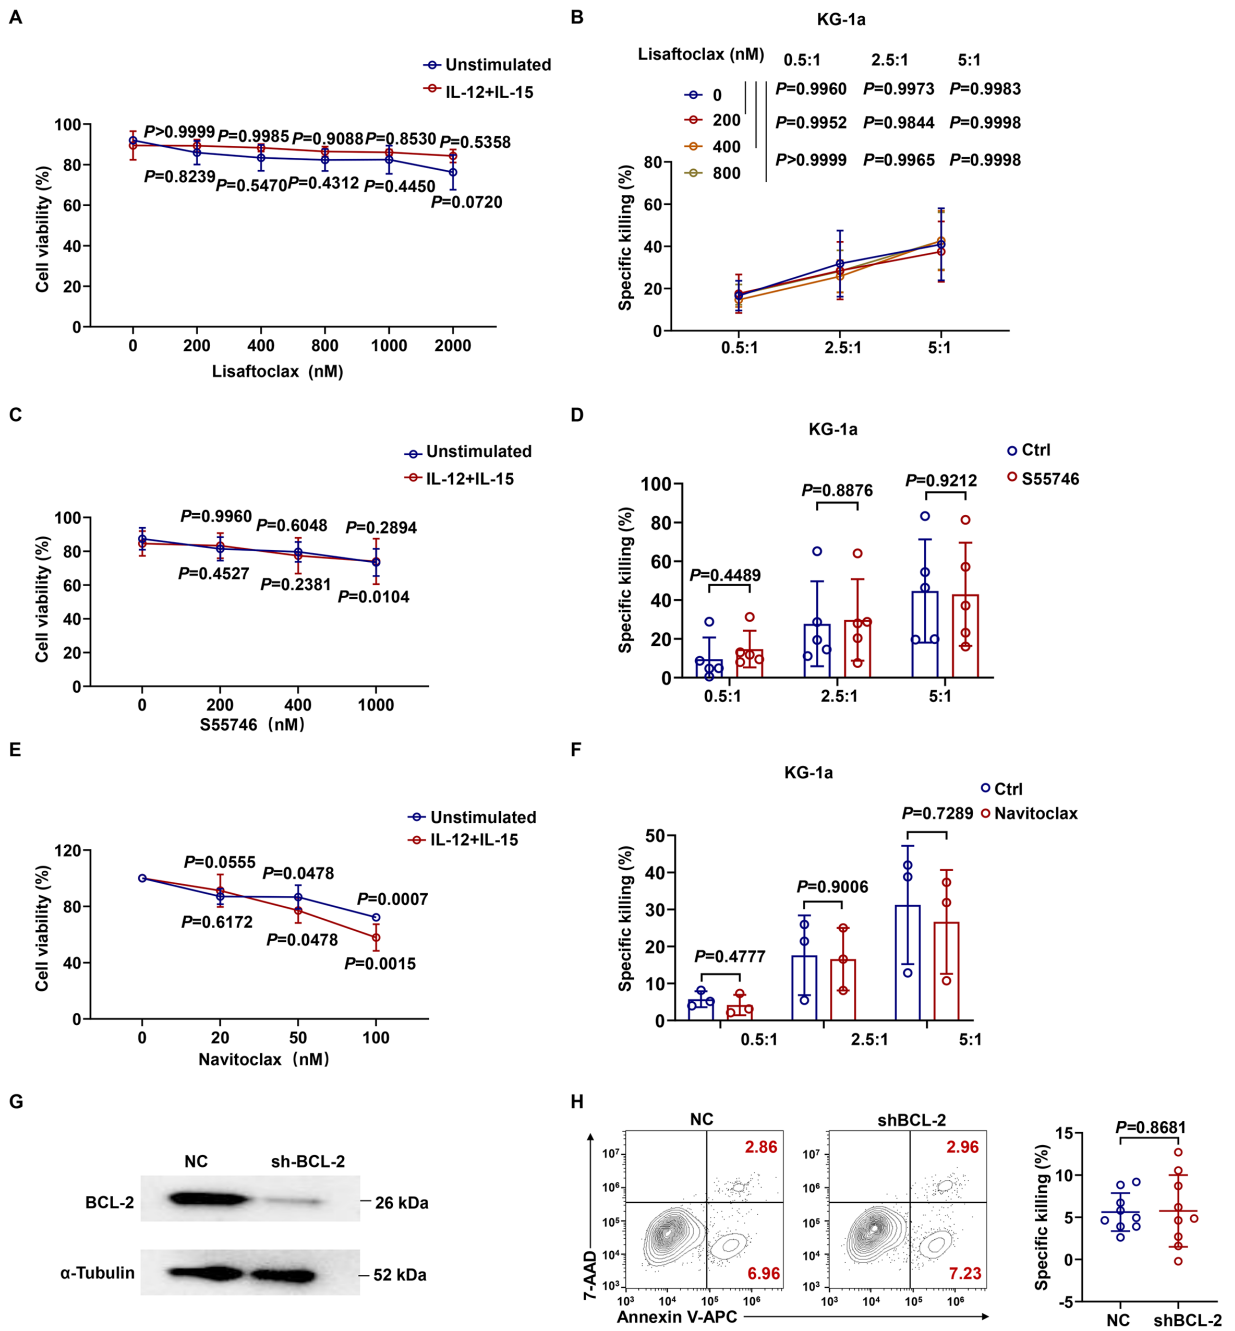

46

47

48

49

50

51

52

53 **Figure S2. Venetoclax enhances NK cell cytotoxicity against AML, likely independent of BCL-2 inhibition,**  
54 **related to Figure 1.**

55 (A) Survival of CB-NK cells after 18 h of treatment with various concentrations of Lisafoclax (a selective BCL-2  
56 inhibitor), assessed by an Annexin V/7-AAD co-staining assay (n=3, biological replicates).

57 (B) Cytotoxicity of NK cells ( $5 \times 10^4$  cells per well) from different donors treated with Lisafoclax for 18 h or left  
58 untreated, and co-cultured with KG-1a cells for 4 h at different E: T ratios (n=4, biological replicates). The results  
59 represent two independent experiments.

60 (C) Survival of CB-NK cells treated with different concentrations of S55746 (a selective BCL-2 inhibitor) for 18 h, as  
61 assessed by an Annexin-V/7-AAD co-staining assay (n=6, biological replicates). The results represent two independent  
62 experiments.

63 (D) Cytotoxicity of NK cells ( $5 \times 10^4$  cells per well) from different donors treated with 200 nM S55746 for 18 h or left  
64 untreated, followed by 4 h co-culture with KG-1a cells at different E: T ratios (n=5, biological replicates). The viability  
65 of AML cells was assessed by an Annexin V/7-AAD co-staining assay. The results represent three independent  
66 experiments.

67 (E) Survival of CB-NK cells treated with different concentrations of navitoclax (a BCL-2/BCL-xL inhibitor) for 18 h,  
68 as assessed by an Annexin-V/7-AAD co-staining assay (n=3, biological replicates). The results represent two  
69 independent experiments.

70 (F) Cytotoxicity of NK cells ( $5 \times 10^4$  cells per well) from different donors treated with 20 nM Navitoclax or left untreated  
71 for 18 h, followed by 4 h co-culture with KG-1a cells at different E: T ratios. The viability of KG1a cells was assessed  
72 by an Annexin V/7-AAD co-staining assay (n=3, biological replicates). The results represent two independent  
73 experiments.

74 (G) Western blot analysis showing BCL-2 knockdown in CB-NK cells using negative control shRNA (NC) or BCL-2  
75 shRNA (sh-BCL-2), with  $\alpha$ -Tubulin as a loading control.

76 (H) Cytotoxicity assay with CB-NK cells ( $2 \times 10^4$  cells per well) infected with control shRNA or BCL-2 shRNA against  
77 KG-1a cells at a 1:1 ratio for 4 h (n=9, biological replicates). The results represent three independent experiments using  
78 NK cells from different donors.

79 Statistical significance was calculated by unpaired Student's t-test (D, F, and H) or one-way ANOVA with Tukey's  
80 multiple comparisons test (A, B, C, and E). The data are represented as mean  $\pm$  SD. For B, the data are presented as  
81 mean  $\pm$  SEM.

82

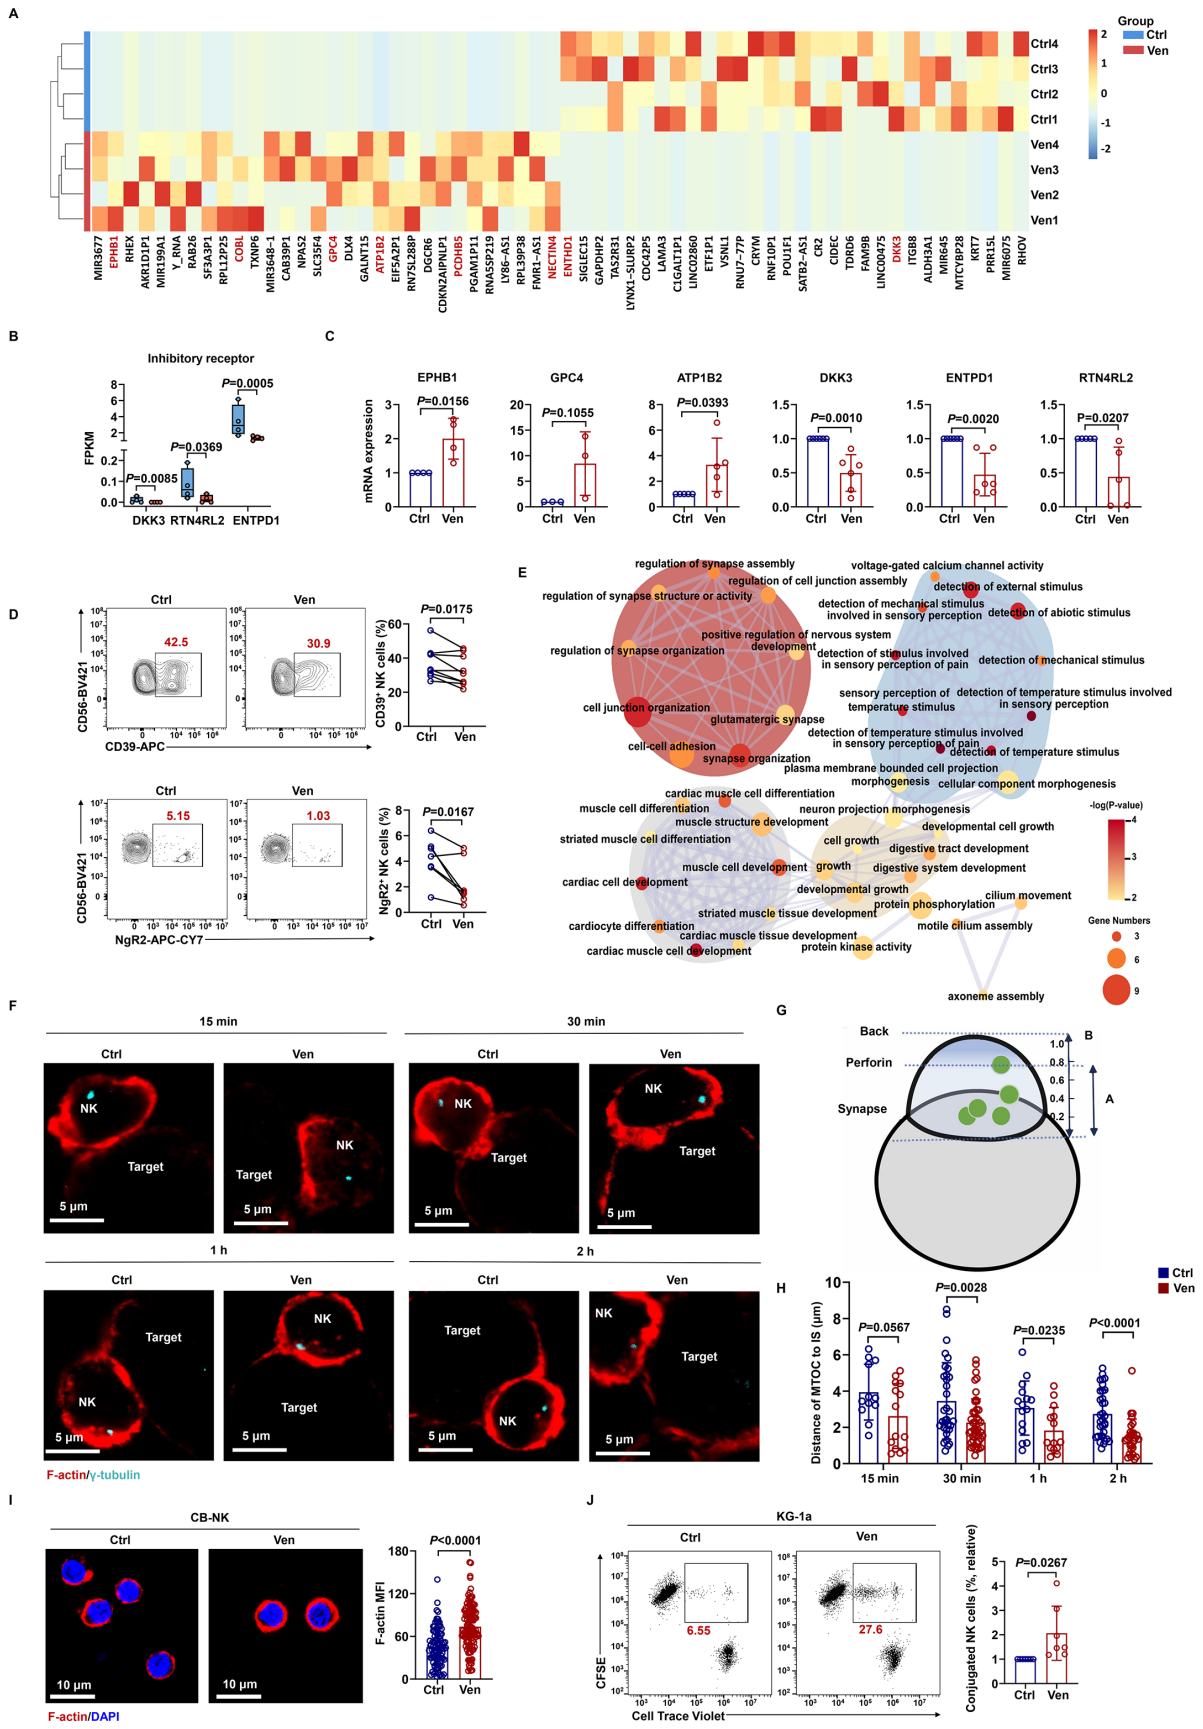

84 **Figure S3. Venetoclax modulates NK cell actin polymerization, microtubule dynamics, and conjugate formation**  
85 **with AML cells, related to Figure 3.**

- 86 (A) Heatmap of the top 30 differentially expressed genes between venetoclax-treated (Ven) and control (Ctrl) NK cells.
- 87 (B) The distribution of DEG (inhibitory receptor) values in each sample from RNA-seq.
- 88 (C) Quantitative real-time PCR verification of randomly selected DEGs in venetoclax (400 nM for 18 h)-treated or  
89 untreated CB-NK cells. *GAPDH* was used as an internal reference gene. The results represent two independent  
90 experiments.
- 91 (D) Flow cytometric detection of CD39 (n=9, biological replicates) and NgR2 (n=7, biological replicates) protein  
92 expression in venetoclax (400 nM for 18 h)-treated or untreated CB-NK cells. The results represent three independent  
93 experiments.
- 94 (E) Network plots of GO-enriched terms, highlighting upregulated terms in the venetoclax-treated group.
- 95 (F) Representative confocal images of NK-KG-1a conjugates stained for  $\gamma$ -tubulin (cyan) and F-actin (red). Untreated  
96 or venetoclax-treated (400 nM for 18 h) NK cells ( $1 \times 10^5$  cells per well) were incubated with KG-1a cells at a 1:1 ratio  
97 for varying time durations.
- 98 (G) Schematic illustrating the measurement of the polarization distance from perforin to the IS.
- 99 (H) Graphs showing the distance between the MTOC and the IS. The results represent two independent experiments.
- 100 (I) Left: representative confocal images of venetoclax (400 nM for 18 h)-treated or untreated NK cells stained with  
101 DAPI (blue) and F-actin (red). Right: graphs showing the mean F-actin staining intensity of each cell (control group,  
102 n=95; venetoclax-treated group, n=110). The results represent three independent experiments.
- 103 (J) Representative flow cytometry plots (left) and quantification (right) of the conjugation of venetoclax (400 nM for  
104 18 h)-treated or untreated NK cells with target KG-1a cells at 1:4 ratio for 1 h (n=7, biological replicates). Numbers  
105 represent the percentages of NK cells conjugated to target cells within the whole NK cell population. The statistical  
106 graph shows the relative values of the venetoclax-treated group compared to the untreated group. The results represent  
107 three independent experiments.
- 108 Statistical significance was calculated by unpaired Student's *t*-test (B, C, H, and I), paired Student's *t*-test (D and J),  
109 and hypergeometric tests (E). The data are represented as mean  $\pm$  SD.



A

| Group name | Number of cells | Median genes per cells | Median UMIs per cells | Median mt% per cells |
|------------|-----------------|------------------------|-----------------------|----------------------|
| Ctrl       | 6050            | 2485                   | 6677                  | 3.39                 |
| Ven        | 8996            | 2384                   | 6253                  | 3.6                  |

B

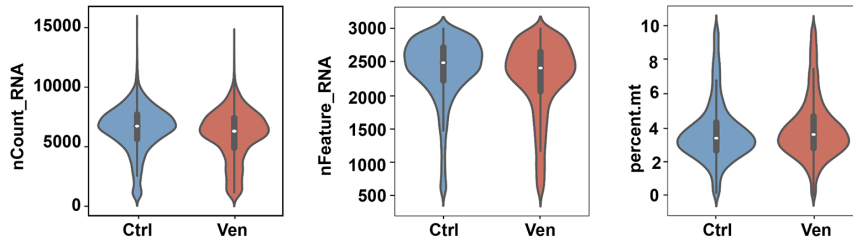

C

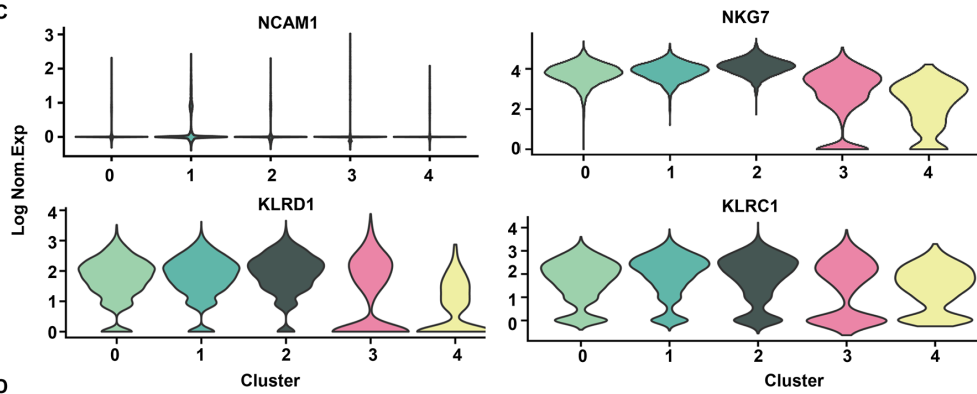

D

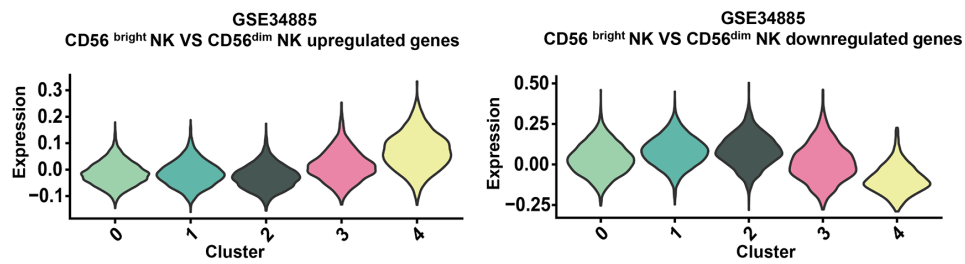

E

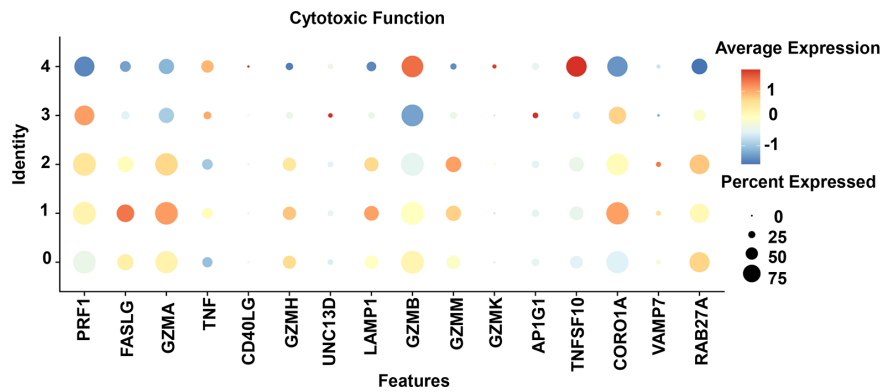

111 **Figure S4. Quality control and phenotypic characteristics of scRNA-seq data obtained from venetoclax-treated**  
112 **or untreated CB-NK cells, related to Figure 4.**

113 (A) Overview of median genes per cell, median UMIs per cell, median mt% per cell, and the number of cells passing  
114 the quality control criteria for scRNA-seq data.

115 (B) Violin plots depicting the nCount, nFeature, and percent.mit (percentage of mitochondrial genes in the  
116 transcriptome) single-cell data parameters of the control and venetoclax-treated NK cells.

117 (C) Violin plots displaying the expression of genes defining NK cells in each cluster.

118 (D) Violin plots depicting the expression levels of upregulated (left)/downregulated (right) genes in CD56<sup>bright</sup> vs.  
119 CD56<sup>dim</sup> NK cells in each subcluster.

120 (E) Bubble plot illustrating representative genes related to NK cell cytotoxicity.

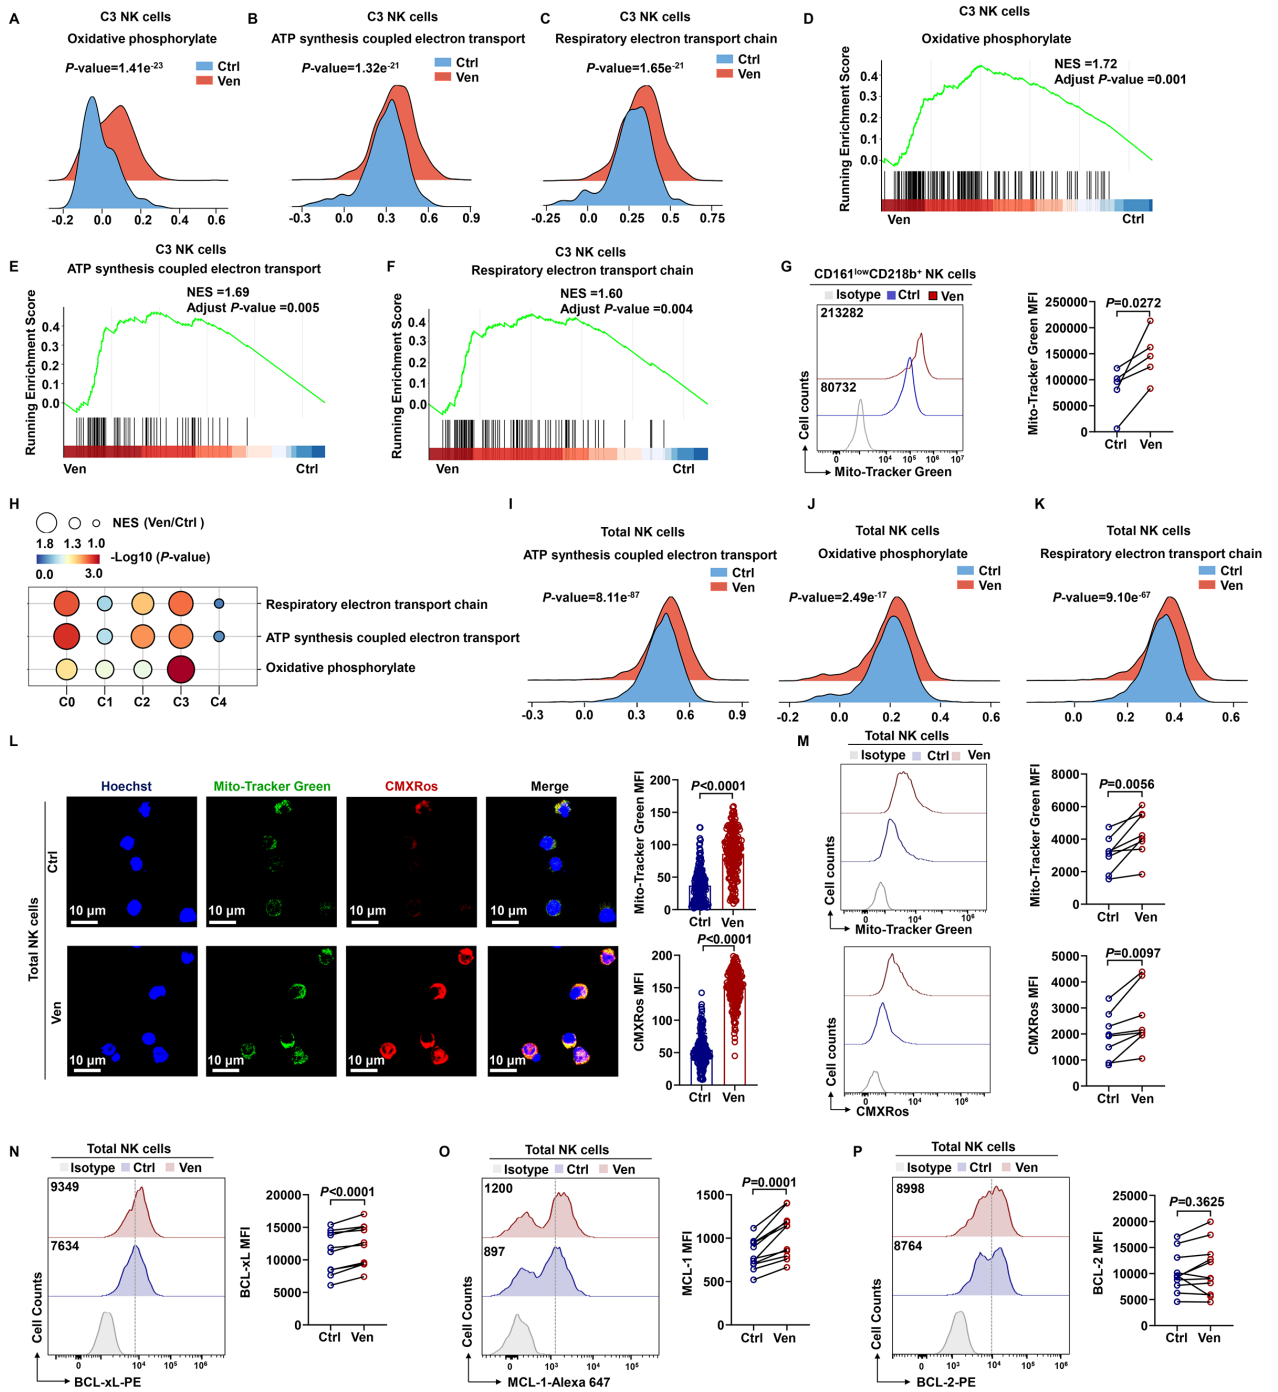

122

123

124

125

126 **Figure S5. Venetoclax treatment upregulates mitochondrial metabolism and the expression of BCL-xL and**  
127 **MCL-1 in NK cells, related to Figure 5.**

128 (A-C) Elevated expression of gene signatures for OXPHOS (A), ATP synthesis-coupled electron transport (B), and  
129 respiratory electron transport chain (ETC) (C) in C3 NK cells of the venetoclax-treated group.

130 (D-F) GSEA plots illustrating enrichment of the response to OXPHOS (D), ATP synthesis-coupled electron transport  
131 (E), and respiratory ETC (F) in C3 NK cells of the venetoclax-treated group. NES, normalized enrichment score.

132 (G) MitoTracker Green staining of C3 NK cells treated with or without venetoclax (400 nM, 18 h) analyzed by flow  
133 cytometry (n=5, biological replicates). The results represent two independent experiments.

134 (H) GSEA using mitochondrial metabolism-related gene sets from MSigDB in the indicated subpopulations.

135 (I-K) Elevated expression of ATP synthesis-coupled electron transport (I), OXPHOS (J), and respiratory ETC (K)  
136 signature genes in venetoclax-treated total NK cells.

137 (L) Representative images and quantification of the mitochondrial phenotype in total NK cells treated with or without  
138 400 nM venetoclax for 18 h (control group, n=161; venetoclax-treated group, n=199; MitoTracker Green, green;  
139 MitoTracker Red CMXRos, CMXRos, red; blue, Hoechst). The results represent three independent experiments using  
140 NK cells from different donors.

141 (M) Representative histograms and quantification of the mean fluorescence intensity of MitoTracker Green (n=8,  
142 biological replicates) and MitoTracker Red CMXRos (CMXRos, n=8, biological replicates) in total NK cells treated  
143 with or without 400 nM venetoclax for 18 h. The results represent three independent experiments using NK cells  
144 from different donors.

145 (N-P) Flow cytometric analysis of BCL-xL(N), MCL-1(O), and BCL-2 (P) expression in venetoclax (400 nM for 18  
146 h)-treated or untreated CB-NK cells (n=10-11, biological replicates). The results represent three independent  
147 experiments.

148 Statistical significance was calculated by paired Student's *t*-test (G, M, N, O, and P), unpaired Student's *t*-tests (A, B,  
149 C, I, J, K, and L), multiple hypothesis tests (D, E, and F), or hypergeometric tests (H). The data are represented as  
150 mean  $\pm$  SD.

151

152

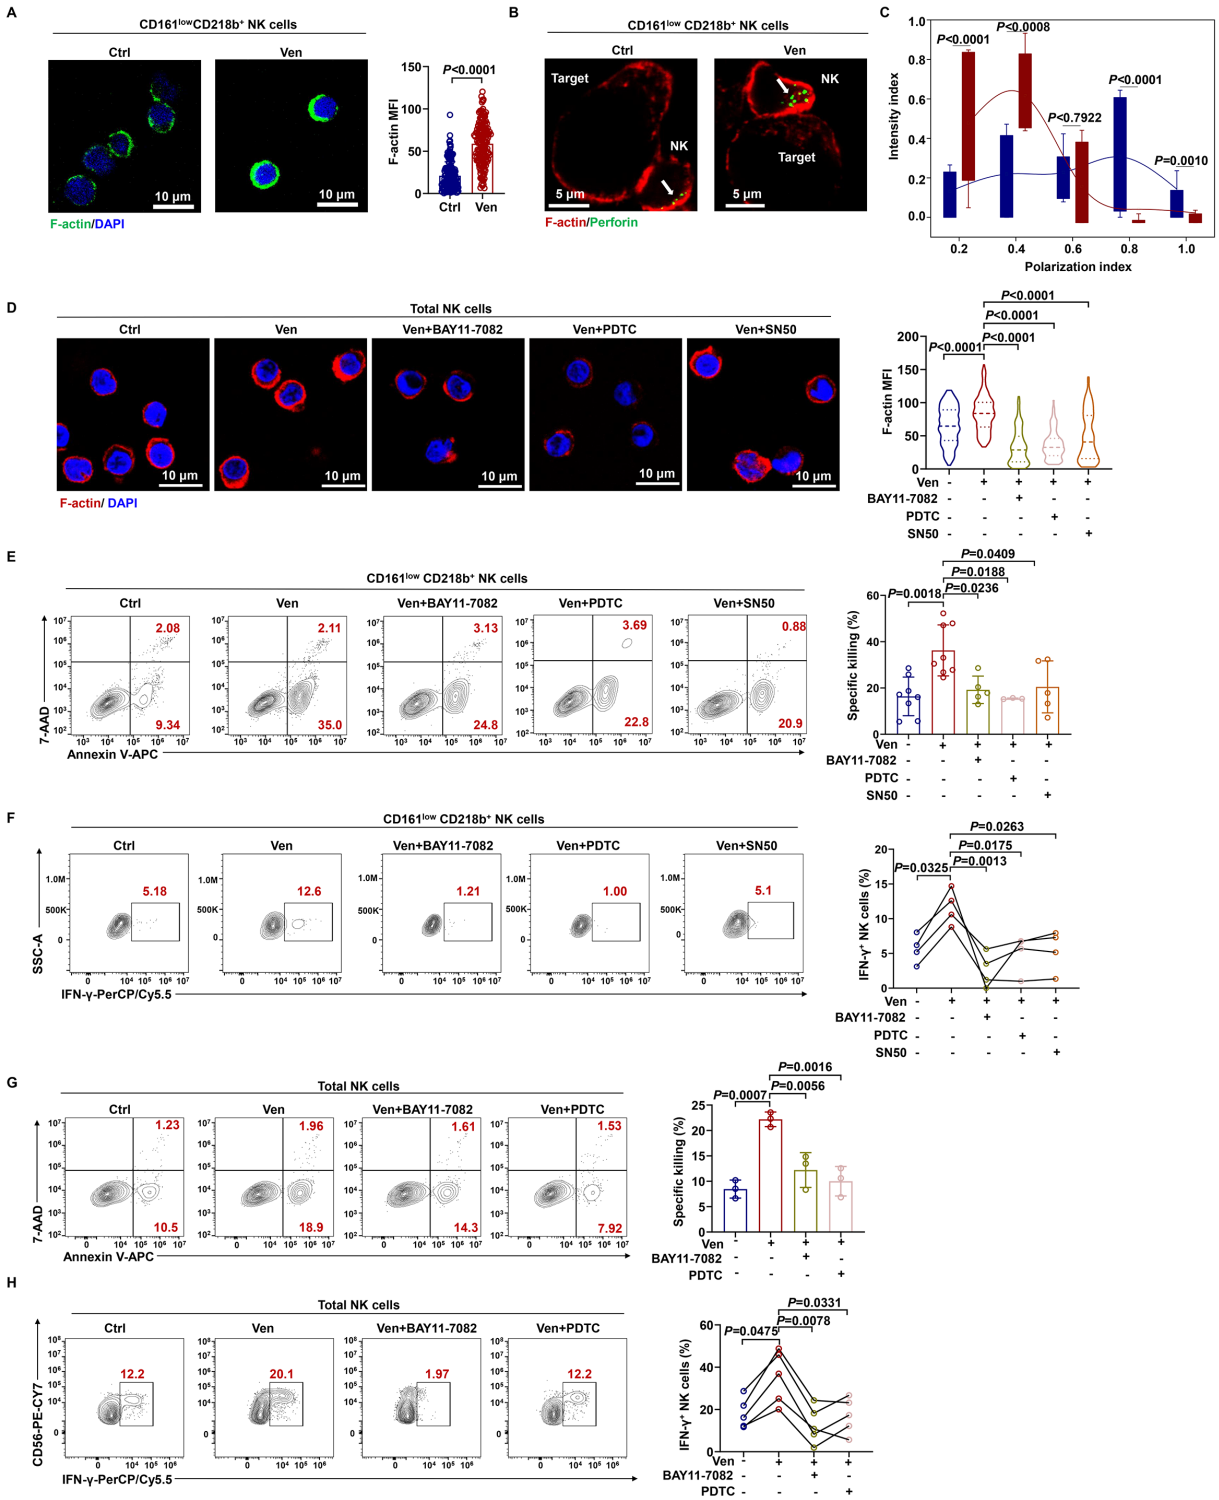

154

155

156

157 **Figure S6. Inhibition of NF- $\kappa$ B signaling attenuates venetoclax-induced effects on NK cell function and**  
158 **cytoskeleton remodeling, related to Figure 7.**

159 (A) Confocal microscopy images (left) and statistical analyses (right) of C3 NK cells treated with or without venetoclax  
160 (400 nM for 18 h), stained with DAPI (nuclei, blue) and F-actin (green). The results represent two independent  
161 experiments.

162 (B) Confocal microscopy images showing F-actin (red) and Perforin (green) in cell conjugates formed 1 h after co-  
163 incubating C3 NK cells ( $1 \times 10^5$  cells per well) treated with or without 400 nM venetoclax, with KG-1a cells at a ratio  
164 of 1:1.

165 (C) Measurement of granule-to-synapse distances in 32-51 conjugates per condition from B. The results represent three  
166 independent experiments.

167 (D) Left: representative confocal images of total NK cells treated with venetoclax (400 nM) alone or in combination  
168 with NF- $\kappa$ B inhibitors (BAY 11-7082 1  $\mu$ M; PDTC 5  $\mu$ M; SN50 25  $\mu$ g/ml), stained with DAPI (blue) and phalloidin  
169 (F-actin, red). Right: graphs showing the mean intensity of F-actin for each cell (control group, n=263; venetoclax-  
170 treated group, n=263; venetoclax + BAY 11-7082 group n=120; venetoclax + PDTC group n=121; venetoclax + SN50  
171 group n=107). The results represent three independent experiments.

172 (E) Representative flow cytometry plots and quantification of specific killing of C3 NK cells ( $2 \times 10^4$  cells per well)  
173 after venetoclax treatment alone or in combination with NF- $\kappa$ B inhibitors against KG-1a cells (1:1 ratio, 4 h, n=3-8  
174 biological replicates). The results represent three independent experiments.

175 (F) Representative flow cytometry plots and quantification of IFN- $\gamma$  expression in C3 NK cells after venetoclax  
176 treatment alone or in combination with NF- $\kappa$ B inhibitors (n=4, biological replicates). The results represent three  
177 independent experiments.

178 (G) Representative flow cytometry plots and quantification of specific killing of total NK cells ( $5 \times 10^4$  cells per well)  
179 treated with venetoclax alone or in combination with NF- $\kappa$ B inhibitors against KG-1a cells (2.5:1 ratio, 4 h, n=3,  
180 biological replicates). The results represent two independent experiments.

181 (H) Representative flow cytometry plots and quantification of IFN- $\gamma$  expression in total NK cells treated with  
182 venetoclax alone or in combination with NF- $\kappa$ B inhibitors (n=5, biological replicates). The results represent three  
183 independent experiments.

184 For all assays involving venetoclax and NF- $\kappa$ B inhibitors presented from Figures E to H, the concentrations follow  
185 those specified in (D). Statistical significance was calculated by unpaired Student's t-tests (A and C); one-way  
186 ANOVA with Tukey's multiple comparisons test (D, E, F, G, and H). The data are represented as mean  $\pm$  SD.

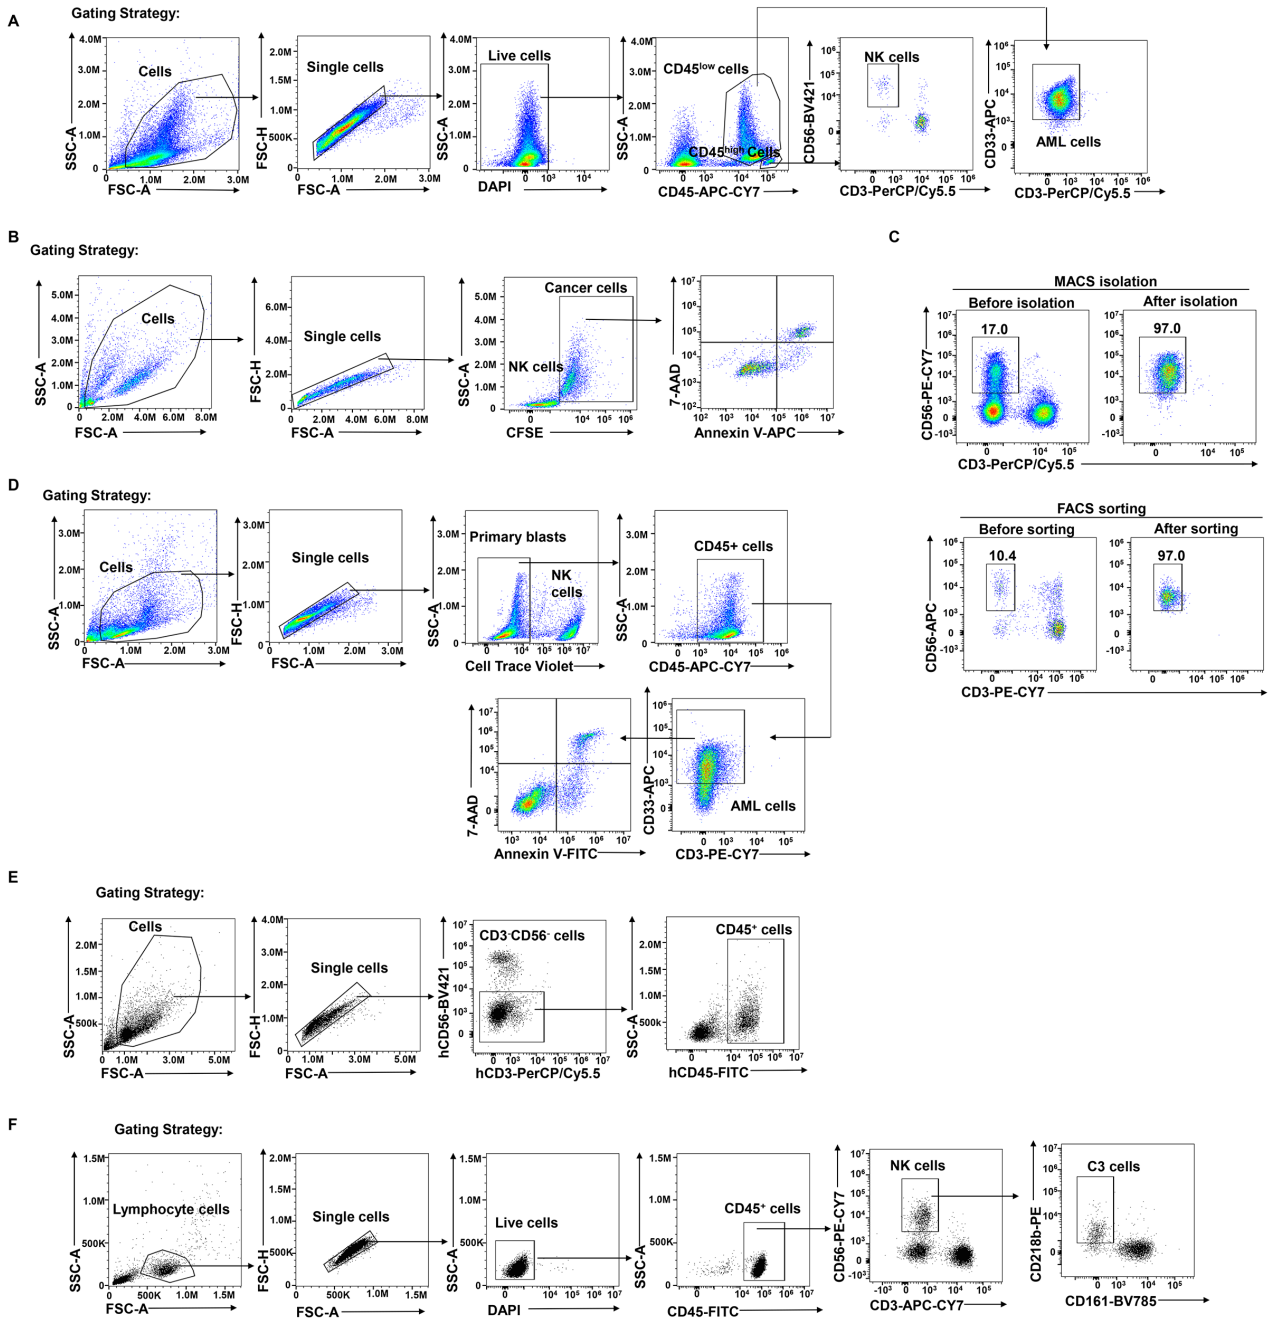

188 **Figure S7. Gating strategies in the multiparameter flow cytometry and cell sorting experiments, related to**

189 **STAR METHODS.**

190 (A) Gating strategy for separating AML-NK cells and primary AML cells.

191 (B) Gating strategy for NK cells and AML cell line co-culture experiments. AML cells were labeled with CFSE (see

192 STAR METHODS).

- 193 (C) Isolation of NK cells from CBMCs and PBMCs using the NK Cell Isolation Kit, and isolation of NK cells from  
194 the bone marrow of AML patients using flow sorting. The CD3<sup>-</sup>CD56<sup>+</sup> cell subset was detected by flow cytometry  
195 before and after cell sorting to assess sorted NK cell purity.
- 196 (D) Gating strategy for NK cells and primary AML cells co-culture experiments.
- 197 (E) Gating strategy for detection of leukemia burden in the bone marrow of the KG-1a transplanted mouse model.
- 198 (F) Gating strategy for detecting the CD45<sup>+</sup>CD3<sup>-</sup>CD56<sup>+</sup>CD161<sup>low</sup>CD218b<sup>+</sup> subset within CB-NK cells.
